# Supplementary material for: Electron-rich triarylphosphines as nucleophilic catalysts for oxa-Michael reactions
Source: publisher site journal article supplement (doi:10.3762/bjoc.17.117), 2021-07-21
Supplement: Additional file 1 [file 1860-5397-17-117-S1.pdf]

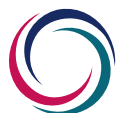

## Supporting Information

for

### Electron-rich triarylphosphines as nucleophilic catalysts for oxa-Michael reactions

Susanne M. Fischer, Simon Renner, A. Daniel Boese and Christian Slugovc

*Beilstein J. Org. Chem.* **2021**, *17*, 1689–1697. [doi:10.3762/bjoc.17.117](https://doi.org/10.3762/bjoc.17.117)

**Experimental details, data in tabular form, NMR spectra**

## Experimental details

### *Synthesis of (4-methoxyphenyl)diphenylphosphine (MMTPP)*

The synthesis was performed according to a literature procedure.<sup>1</sup> Under a nitrogen atmosphere, a 100 mL Schlenk tube was charged with dry THF (30 mL) and 4-bromoanisole (1.56 g, 8.34 mmol). The tube was cooled to  $-80^{\circ}\text{C}$  with an acetone– $\text{N}_2$  bath for 30 min before *n*-butyllithium (5.7 mL, 1.6 M in hexanes, 8.9 mmol, 1.1 equiv) was added. The reaction mixture was stirred for 1 h. Then, chlorodiphenylphosphine (2.51 g, 11.4 mmol, 1.33 equiv) dissolved in THF (6 mL) was added and the reaction mixture was stirred for another 4 h at  $-80^{\circ}\text{C}$  before it was warmed to room temperature overnight. The reaction was quenched with saturated  $\text{NH}_4\text{Cl}$  solution (15 mL) and water (15 mL). The organic phase was separated and subsequently washed with saturated NaCl solution (30 mL) and water (30 mL). The solvent was removed under reduced pressure whereupon a yellow, oily liquid remained. The crude product was purified by silica gel column chromatography with cyclohexane/dichloromethane 4:1 as eluent to give the product as colorless crystals (0.886 g, 3.03 mmol, 35.5% yield).

### *Reactions with acrylonitrile as Michael acceptor*

Conversion of acrylonitrile was determined by integration of the signals deriving from the residual Michael acceptor (6.26–6.20 ppm,  $^1\text{H}$ ) and the  $\text{CH}_2$  group in the  $\beta$ -position to the cyano group. NMR spectra of **1a–d** are exemplarily shown in Figure S1, Figure S2, Figure S3, and Figure S4.

**Table S1:** Conversion of acrylonitrile (%) in the oxa-Michael reaction with alcohols **a–d** after 1 h and 24 h catalyzed by 1 mol % phosphine at room temperature ( $23^{\circ}\text{C}$ ).

|                              | TPP  |      | MMTPP |      | TMTTPP |      |
|------------------------------|------|------|-------|------|--------|------|
| Alcohol (Product)            | 1 h  | 24 h | 1 h   | 24 h | 1 h    | 24 h |
| Propan-2-ol ( <b>1a</b> )    | 0    | 0    | 0     | 2.8  | 4.1    | 38.2 |
| Propan-1-ol ( <b>1b</b> )    | 2.4  | 26.7 | 16.3  | 65.9 | 73.2   | 97.6 |
| Prop-2-en-1-ol ( <b>1c</b> ) | 6.1  | 37.2 | 29.6  | 75.8 | 86.1   | 97.7 |
| Prop-2-yn-1-ol ( <b>1d</b> ) | 23.1 | 97.0 | 24.5  | 98.7 | 23.6   | 98.9 |

### **3-Isopropoxypropanenitrile<sup>1</sup> (1a):**

Propan-2-ol (2.10 equiv, 0.238 g, 3.96 mmol), acrylonitrile (1.00 equiv, 124  $\mu\text{L}$ , 1.89 mmol), tris(4-methoxyphenyl)phosphine (0.01 equiv, 0.00674 g, 0.0191 mmol).

$^1\text{H}$ -NMR (300.36 MHz,  $\text{CDCl}_3$ ):  $\delta$  3.66 – 3.61 (m, 3H, O-CH-( $\text{CH}_3$ )<sub>2</sub>), 2.57 (t, 2H, CH<sub>2</sub>-CN), 1.20 (d, 6H, O-CH-(CH<sub>3</sub>)<sub>2</sub>).

### **3-Propoxypropanenitrile<sup>2</sup> (1b):**

Propan-1-ol (2.10 equiv, 0.244 g, 4.06 mmol), acrylonitrile (1.00 equiv, 124  $\mu\text{L}$ , 1.89 mmol), tris(4-methoxyphenyl)phosphine (0.01 equiv, 0.00652 g, 0.0185 mmol).

$^1\text{H}$ -NMR (300.36 MHz,  $\text{CDCl}_3$ ):  $\delta$  3.66 – 3.60 (m, 2H, O-CH<sub>2</sub>-CH<sub>2</sub>-CN), 3.44 (t, 2H, O-CH<sub>2</sub>-CH<sub>2</sub>), 2.59 (t, 2H, CH<sub>2</sub>-CN), 1.60 (m, 2H, CH<sub>2</sub>-CH<sub>3</sub>), 0.93 (t, 3H, CH<sub>2</sub>-CH<sub>3</sub>).

### 3-(Allyloxy)propanenitrile<sup>3</sup> (1c):

Prop-2-en-1-ol (2.00 equiv, 0.219 g, 3.78 mmol), acrylonitrile (1.00 equiv, 124  $\mu$ L, 1.89 mmol), tris(4-methoxyphenyl)phosphine (0.00668 g, 0.01 equiv, 0.0190 mmol).

<sup>1</sup>H-NMR (300.36 MHz, CDCl<sub>3</sub>):  $\delta$  5.86-5.78 (m, 1H, CH<sub>2</sub>=CH-CH<sub>2</sub>), 5.27-5.13 (dd, 2H, CH<sub>2</sub>=CH-CH<sub>2</sub>), 3.98 (d, 2H, O-CH<sub>2</sub>-CH), 3.60 (t, 2H, O-CH<sub>2</sub>-CH<sub>2</sub>), 2.55 (t, 2H, O-CH<sub>2</sub>-CH<sub>2</sub>)

### 3-(Prop-2-yn-1-yloxy)propanenitrile<sup>4</sup> (1d):

Prop-2-yn-1-ol (2.00 equiv, 0.223 g, 3.98 mmol), acrylonitrile (1.00 equiv, 124  $\mu$ L, 1.89 mmol), tris(4-methoxyphenyl)phosphine (0.01 equiv, 0.00670 g, 0.0190 mmol).

<sup>1</sup>H-NMR (300.36 MHz, CDCl<sub>3</sub>):  $\delta$  4.22 (d, 2H, O-CH<sub>2</sub>-C-), 3.76 (t, 2H, O-CH<sub>2</sub>-CH<sub>2</sub>), 2.65 (t, 2H, CH<sub>2</sub>-CN), 2.48 (dt, 1H, CH-C-).

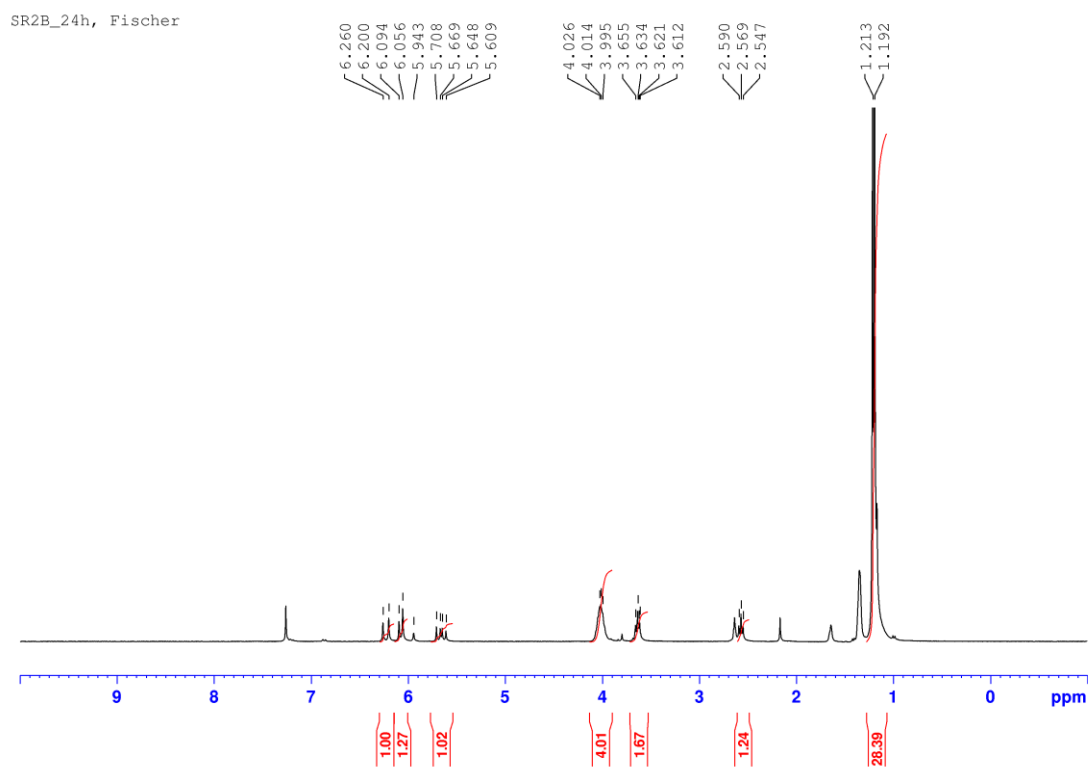

**Figure S1:** <sup>1</sup>H-NMR spectrum (300 MHz, CDCl<sub>3</sub>) of **1a** after 24 h reaction time; as catalyst TMTPP was used; conversion was calculated from the integral ratio of the peaks at 6.26–6.20 and the peak at 2.57.

SR1B, Fischer

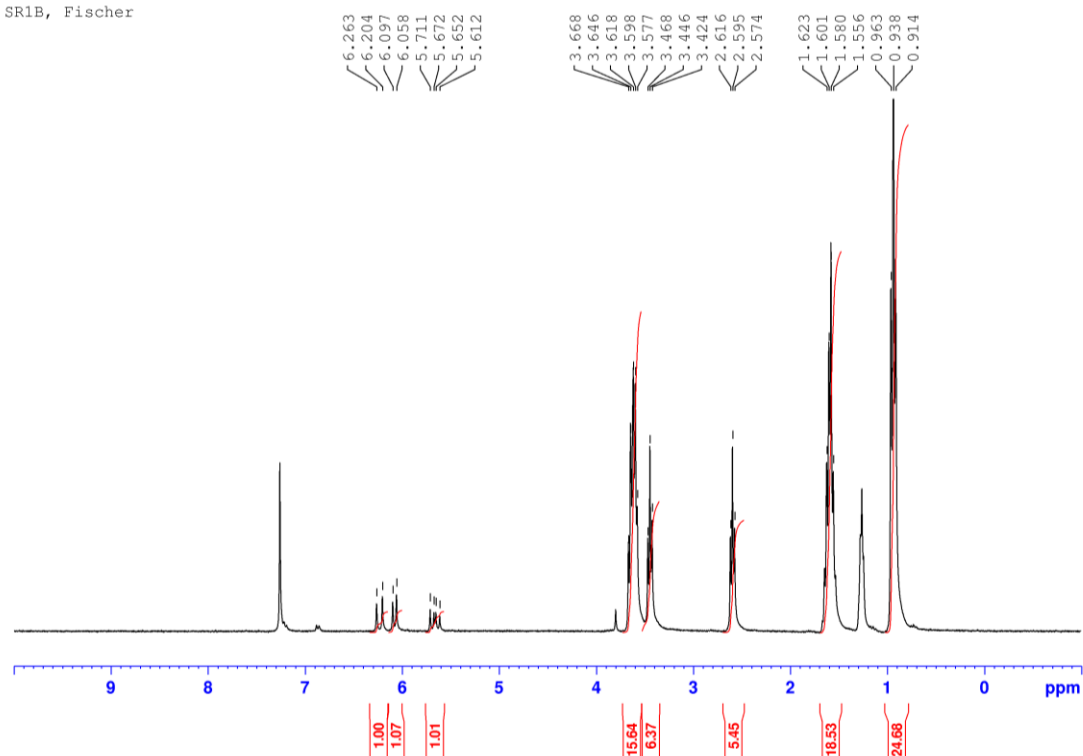

**Figure S2:** <sup>1</sup>H-NMR spectrum (300 MHz, CDCl<sub>3</sub>) of **1b** after 1 h reaction time; as catalyst TMTTP was used; conversion was calculated from the integral ratio of the peaks at 6.26–6.20 and the peak at 2.59.

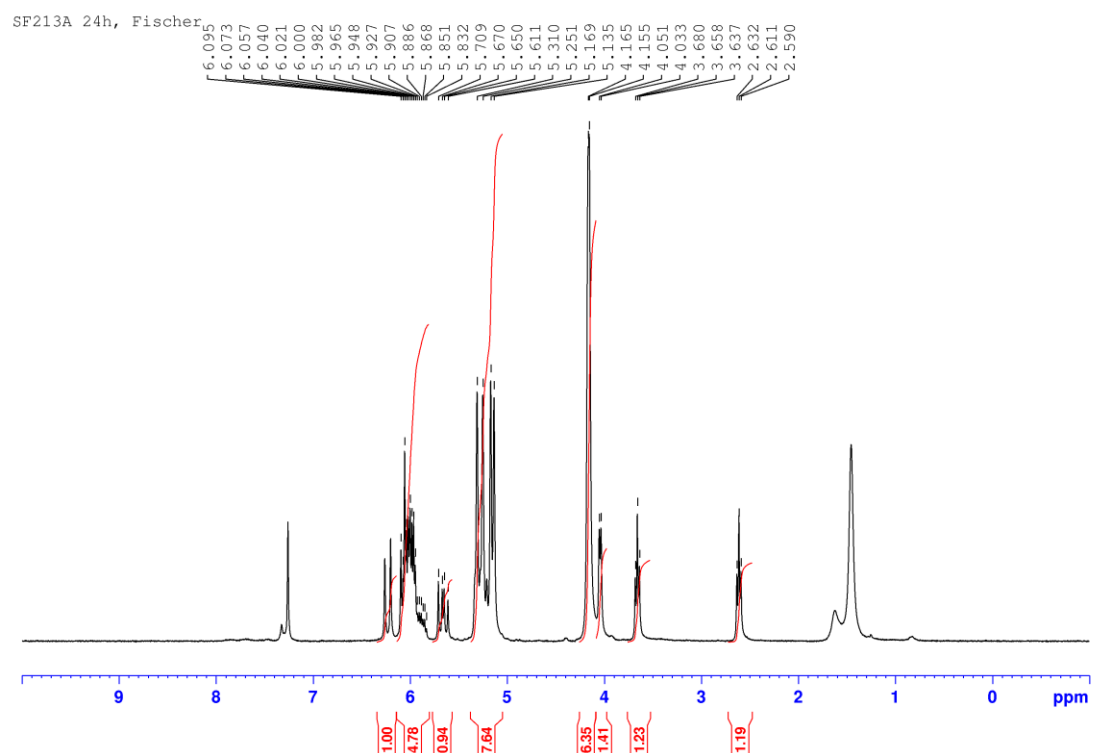

**Figure S3:**  $^1\text{H}$ -NMR spectrum (300 MHz,  $\text{CDCl}_3$ ) of **1c** after 24 h reaction time; as catalyst TPP was used; conversion was calculated from the integral ratio of the peaks at 6.26–6.20 and the peak at 2.61.

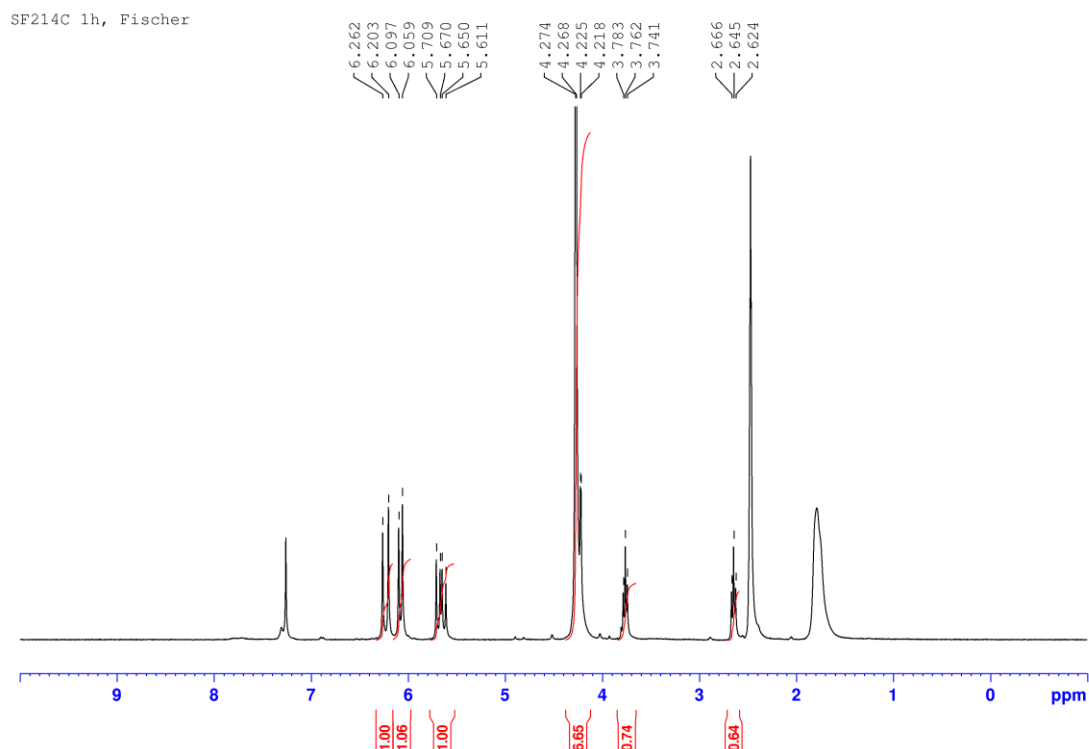

**Figure S4:**  $^1\text{H}$ -NMR spectrum (300 MHz,  $\text{CDCl}_3$ ) of **1d** after 1 h reaction time; as catalyst MMTTP was used; conversion was calculated from the integral ratio of the peaks at 6.26–6.20 and the peak at 2.65 ppm.

### Reactions with acrylamide as Michael acceptor

Conversion of acrylamide was determined by integration of the signals deriving from the residual Michael acceptor (5.61–5.57 ppm,  $^1\text{H}$ ) and the newly formed  $\text{CH}_2$  group. NMR spectra are exemplarily shown in Figure S5, Figure S6, Figure S7, and Figure S8.

**Table S2:** Conversion of acrylamide (%) in the oxa-Michael reaction with various alcohols after 1 h and 24 h catalyzed by 1 mol% phosphine at room temperature (23 °C)

| Alcohol (Product)            | TPP |      | MMTPP |      | TMTTP |      |
|------------------------------|-----|------|-------|------|-------|------|
|                              | 1 h | 24 h | 1 h   | 24 h | 1 h   | 24 h |
| Propan-2-ol ( <b>2a</b> )    | 0   | 0    | 0     | 3.3  | 0     | 9.0  |
| Propan-1-ol ( <b>2b</b> )    | 0   | 7.6  | 0     | 19.0 | 3.6   | 60.6 |
| Prop-2-en-1-ol ( <b>2c</b> ) | 1.6 | 25.3 | 3.6   | 45.7 | 5.5   | 74.4 |
| Prop-2-yn-1-ol ( <b>2d</b> ) | 1.3 | 16.0 | 1.6   | 15.8 | 1.6   | 16.9 |

### 3-Isopropoxypropanamide (**2a**):

Propan-2-ol (2.00 equiv, 217  $\mu\text{L}$ , 2.81 mmol), acrylamide (1.0 equiv, 0.101 g, 1.43 mmol), tris(4-methoxyphenyl)phosphine (0.01 equiv, 0.00498 g, 0.0141 mmol).

$^1\text{H}$ -NMR (300 MHz,  $\text{DMSO-d}_6$ )  $\delta$  7.26 (bs, 1H,  $\text{NH}_2$ ), 6.76 (bs, 1H,  $\text{NH}_2$ ), 3.55 (m, 3H,  $\text{CH-O-CH}_2$ ), 2.23 (t, 2H,  $\text{O=C-CH}_2\text{-CH}_2$ ), 1.05 (d, 6H,  $\text{CH}_3$ )

### 3-Propoxypropanamide (2b):

Propan-1-ol (2.00 equiv, 211  $\mu$ L, 2.81 mmol), acrylamide (1.00 equiv, 0.0999 g, 1.40 mmol), tris(4-methoxyphenyl)phosphine (0.01 equiv, 0.00472 g, 0.0134 mmol).

$^1\text{H}$ -NMR (300 MHz, DMSO- $d_6$ )  $\delta$  7.27 (bs, 1H,  $\text{NH}_2$ ), 6.78 (bs, 1H,  $\text{NH}_2$ ), 3.54 (t, 2H,  $\text{O}=\text{C}-\text{CH}_2-\underline{\text{CH}_2}$ ), 3.31 (t, 2H,  $\text{O}-\underline{\text{CH}_2}-\text{CH}_2-\text{CH}_3$ ), 1.47 (m, 2H,  $\text{O}-\text{CH}_2-\underline{\text{CH}_2}-\text{CH}_3$ ), 0.84 (t, 3H,  $\underline{\text{CH}_3}$ )

$^{13}\text{C}$ -NMR (75.53 MHz, DMSO- $d_6$ )  $\delta$  172.25 ( $\text{C}=\text{O}$ ), 71.57 ( $\text{CH}_3-\text{CH}_2-\underline{\text{CH}_2}-\text{O}$ ), 66.34 ( $\text{O}-\underline{\text{CH}_2}-\text{CH}_2-\text{C}=\text{O}$ ), 35.89 ( $\text{O}-\text{CH}_2-\underline{\text{CH}_2}-\text{C}=\text{O}$ ), 22.37 ( $\text{CH}_3-\underline{\text{CH}_2}-\text{CH}_2-\text{O}$ ), 10.48 ( $\text{CH}_3$ )

### 3-(Allyloxy)propenamide (2c):

Prop-2-en-1-ol (2.00 equiv, 191  $\mu$ L, 2.81 mmol), acrylamide (1.00 equiv, 0.104 g, 1.46 mmol), tris(4-methoxyphenyl)phosphine (0.01 equiv, 0.00500 g, 0.0141 mmol).

$^1\text{H}$ -NMR (300 MHz, DMSO- $d_6$ )  $\delta$  7.29 (bs, 1H,  $\text{NH}_2$ ), 6.79 (bs, 1H,  $\text{NH}_2$ ), 5.92-5.79 (m, 1H,  $\text{CH}_2=\underline{\text{CH}}-\text{CH}_2$ ), 5.27-5.11 (dd, 2H,  $\underline{\text{CH}_2}=\text{CH}-\text{CH}_2$ ), 3.91 (d, 2H,  $\text{CH}_2=\text{CH}-\underline{\text{CH}_2}$ ), 3.56 (t, 2H,  $\text{O}-\underline{\text{CH}_2}-\text{CH}_2$ ), 2.29 (t, 2H,  $\text{O}-\text{CH}_2-\underline{\text{CH}_2}$ )

$^{13}\text{C}$ -NMR (75.53 MHz, DMSO- $d_6$ )  $\delta$  172.17 ( $\text{C}=\text{O}$ ), 135.27 ( $\text{CH}_2=\underline{\text{CH}}-\text{CH}_2$ ), 116.20 ( $\underline{\text{CH}_2}=\text{CH}-\text{CH}_2$ ), 70.78 ( $\text{CH}_2=\text{CH}-\underline{\text{CH}_2}$ ), 66.01 ( $\text{O}-\underline{\text{CH}_2}-\text{CH}_2$ ), 35.81 ( $\text{O}-\text{CH}_2-\underline{\text{CH}_2}$ )

### 3-(Prop-2-yn-1-yloxy)propenamide (2d):

Prop-2-yn-1-ol (2.00 equiv, 166  $\mu$ L, 2.81 mmol), acrylamide (1.00 equiv, 0.101 g, 1.42 mmol), tris(4-methoxyphenyl)phosphine (0.01 equiv, 0.00509 g, 0.0144 mmol).

$^1\text{H}$ -NMR (300 MHz, DMSO- $d_6$ )  $\delta$  7.31 (bs, 1H,  $\text{NH}_2$ ), 6.82 (bs, 1H,  $\text{NH}_2$ ), 4.09 (d, 2H,  $\text{CH}-\text{C}-\underline{\text{CH}_2}$ ), 3.62 (t, 2H,  $\text{O}-\underline{\text{CH}_2}-\text{CH}_2$ ), 3.39 (t, 1H,  $\underline{\text{CH}}-\text{C}-\text{CH}_2$ ), 2.29 (t, 2H,  $\text{O}-\text{CH}_2-\underline{\text{CH}_2}$ )

$^{13}\text{C}$ -NMR (75.53 MHz, DMSO- $d_6$ )  $\delta$  172.06 ( $\text{C}=\text{O}$ ), 80.34 ( $\text{CH}-\underline{\text{C}}-\text{CH}_2$ ), 76.98 ( $\underline{\text{CH}}-\text{C}-\text{CH}_2$ ), 65.69 ( $\text{O}-\underline{\text{CH}_2}-\text{CH}_2$ ), 57.32 ( $\text{CH}-\text{C}-\underline{\text{CH}_2}$ ), 35.51 ( $\text{O}-\text{CH}_2-\underline{\text{CH}_2}$ )

SF247B 24h, Fischer

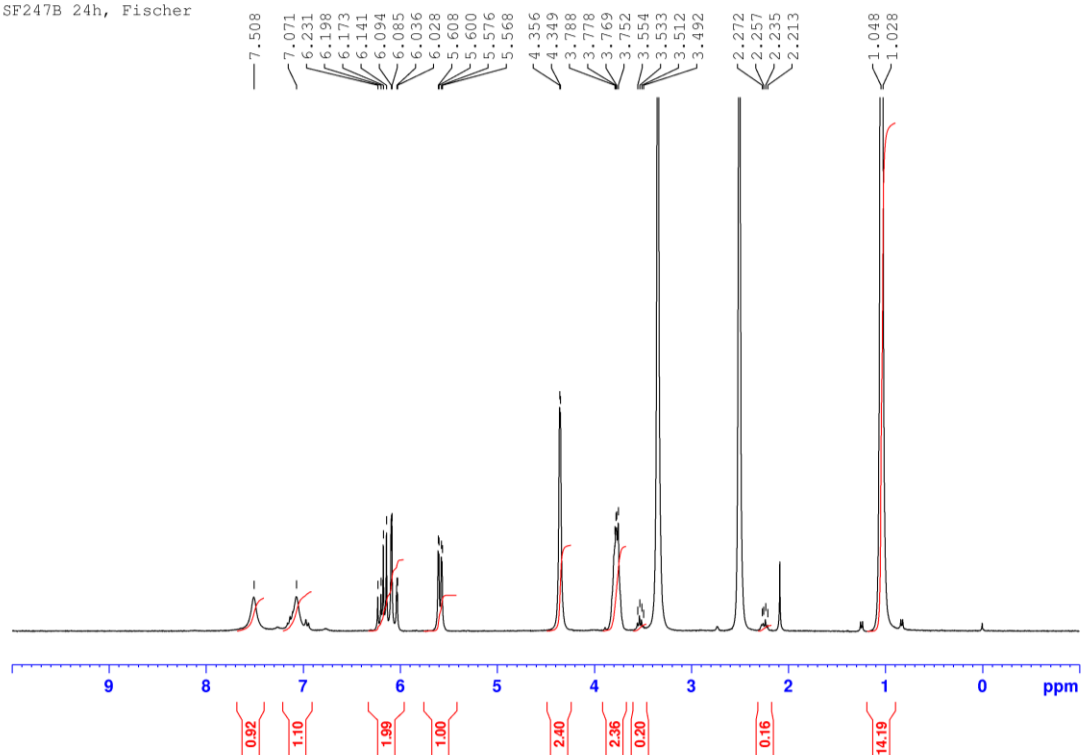

**Figure S5:**  $^1\text{H}$ -NMR spectrum (300 MHz,  $\text{DMSO-}d_6$ ) of **2a** after 24 h reaction time; as catalyst TMTTP was used; conversion was calculated from the integral ratio of the peaks at 5.61–5.58 and the peak at 3.53.



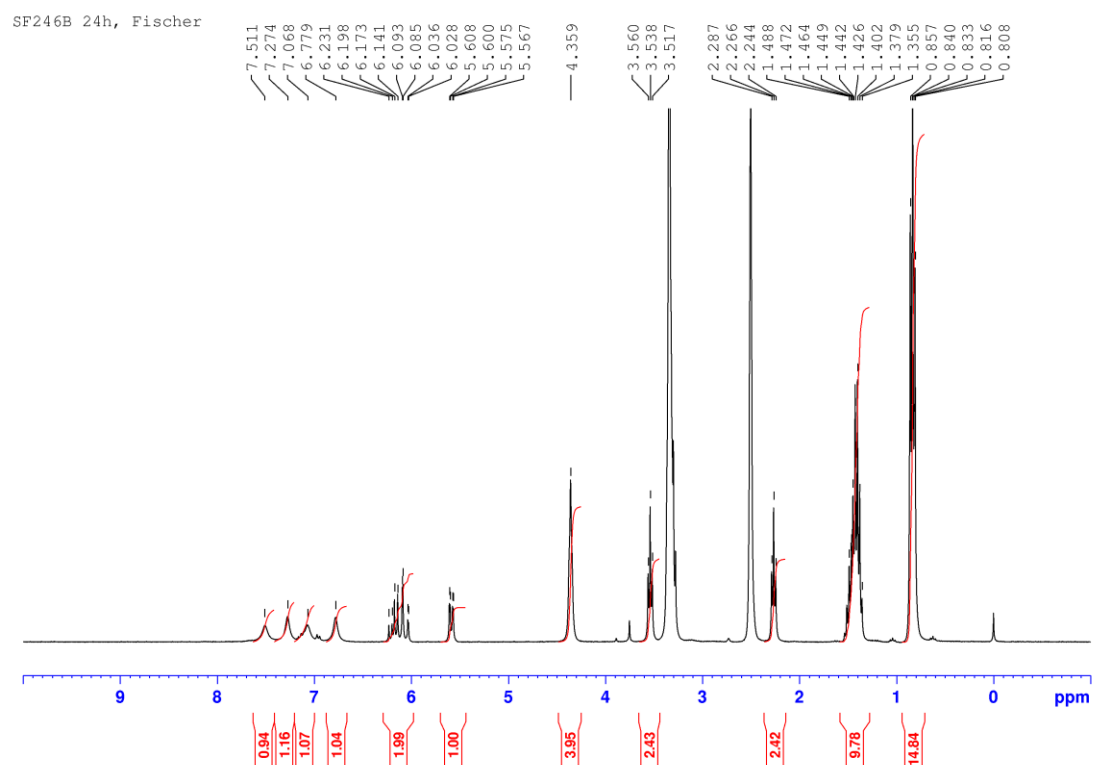

**Figure S6:**  $^1\text{H}$ -NMR spectrum (300 MHz,  $\text{DMSO}-d_6$ ) of **2b** after 24 h reaction time; as catalyst TMTTP was used; conversion was calculated from the integral ratio of the peaks at 5.61–5.58 and the peak at 3.54.

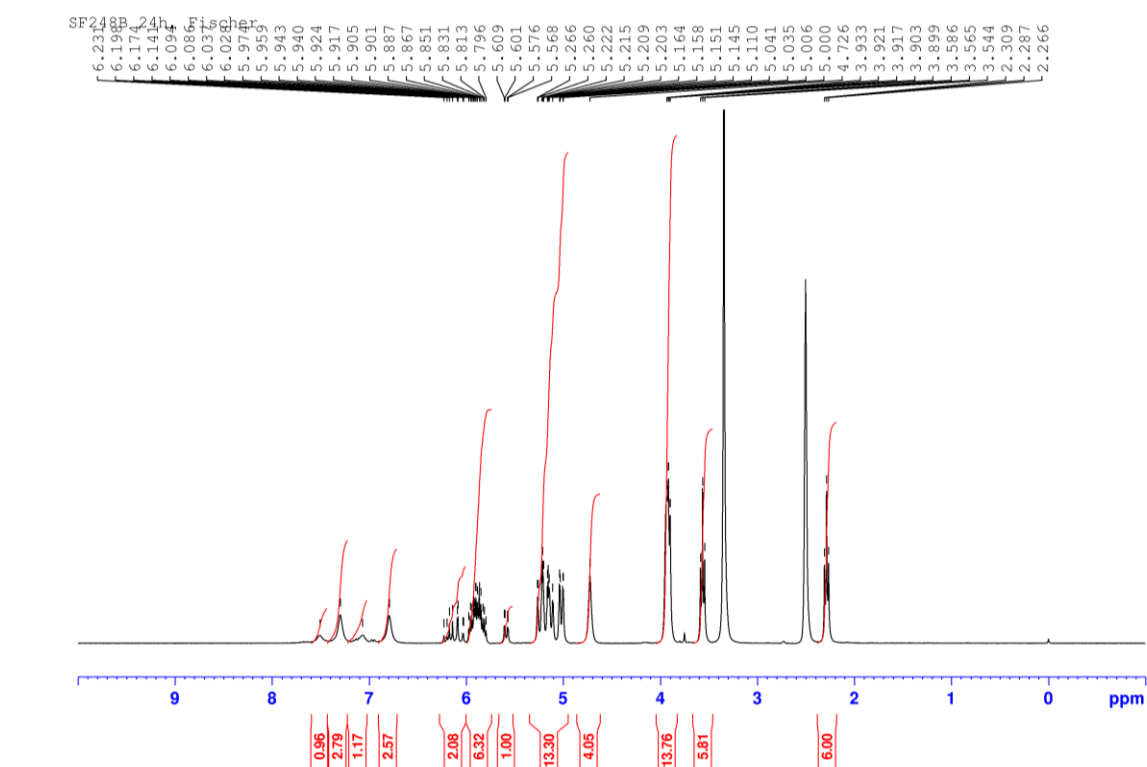

**Figure S7:**  $^1\text{H}$ -NMR spectrum (300 MHz,  $\text{DMSO}-d_6$ ) of **2c** after 24 h reaction time; as catalyst TMTTP was used; conversion was calculated from the integral ratio of the peaks at 5.61–5.58 and the peak at 3.56.

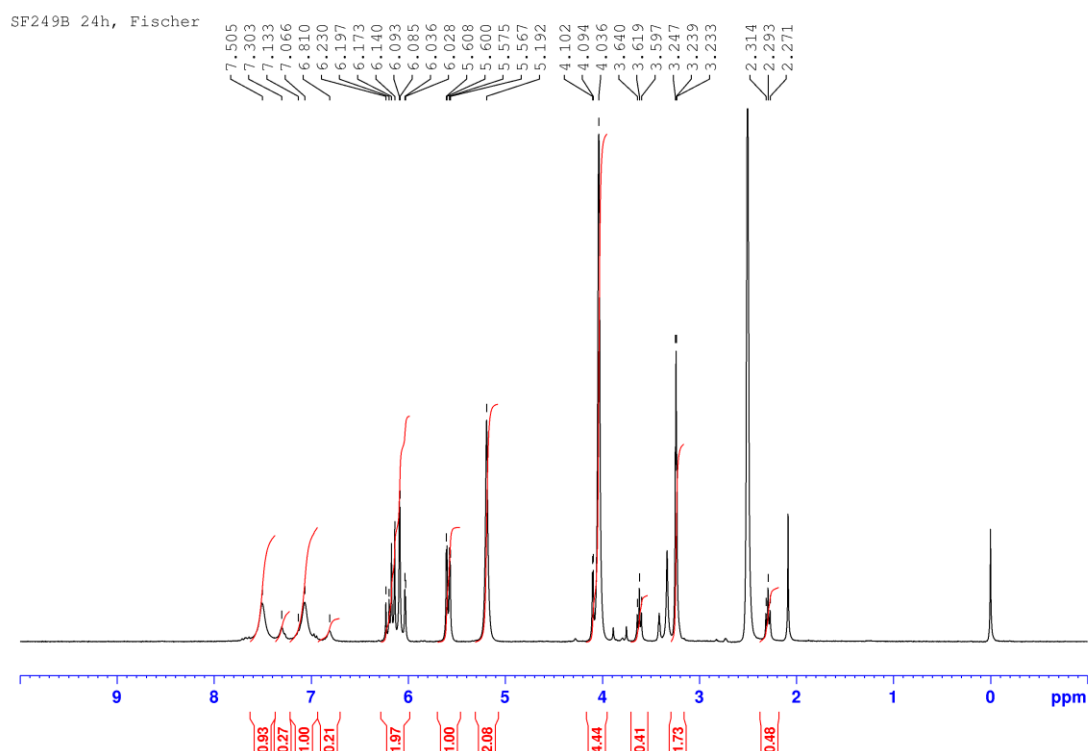

**Figure S8:**  $^1\text{H}$ -NMR spectrum (300 MHz,  $\text{DMSO-}d_6$ ) of **2d** after 24 h reaction time; as catalyst TMTTP was used; conversion was calculated from the integral ratio of the peaks at 5.61–5.58 and the peak at 3.61.

### Reactions with divinyl sulfone as Michael acceptor

Conversion of divinyl sulfone was determined by integration of the signals deriving from the residual Michael acceptor (6.42–6.37 ppm, 1H) and the  $\text{CH}_2$  group in  $\beta$ -position. NMR spectra are exemplarily shown in Figure S9, Figure S10, Figure S11, and Figure S12.

Mono/di ratios were determined from the integral ratio of the signals deriving from the protons adjacent to the sulfur atom (details see figures).

**Table S3:** Conversion of divinyl sulfone and corresponding product ratios mono/di [%] in the oxa-Michael reaction with alcohols **a–d** after 1 h and 24 h catalyzed by 1 mol % phosphine at room temperature (23 °C)

|                              | TPP   |       | MMTPP |       | TMTTP |       |
|------------------------------|-------|-------|-------|-------|-------|-------|
|                              | 1 h   | 24 h  | 1 h   | 24 h  | 1 h   | 24 h  |
| Alcohol (Product)            |       |       |       |       |       |       |
| Propan-2-ol ( <b>3a</b> )    | 53/3  | 52/48 | 58/3  | 33/67 | 65/5  | 17/83 |
| Propan-1-ol ( <b>3b</b> )    | 28/72 | 0/100 | 28/72 | 0/100 | 30/70 | 0/100 |
| Prop-2-en-1-ol ( <b>3c</b> ) | 29/70 | 0/100 | 42/58 | 11/89 | 21/79 | 0/100 |
| Prop-2-yn-1-ol ( <b>3d</b> ) | 40/60 | 0/100 | 52/48 | 0/100 | 31/69 | 0/100 |

**2-(2-((2-Isopropoxyethyl)sulfonyl)ethoxy)propane (3a):**

Propan-2-ol (3.00 equiv, 194  $\mu$ L, 2.54 mmol), divinyl sulfone (1.00 equiv, 85.1  $\mu$ L, 0.847 mmol), tris(4-methoxyphenyl)phosphine (0.01 equiv, 0.00305 g, 0.00866 mmol)

$^1\text{H-NMR}$  (300 MHz,  $\text{CDCl}_3$ )  $\delta$  3.84 (t, 4H,  $\text{CH}_2\text{-S-CH}_2$ ), 3.63 (m, 2H,  $\text{CH}$ ), 3.31 (t, 4H,  $\text{-CH}_2\text{-CH}_2\text{-S-}$ ), 1.16 (d, 12H,  $\text{CH}_3$ ).

**1-(2-((2-Propoxyethyl)sulfonyl)ethoxy)propane (3b):**

Propan-1-ol (3.00 equiv, 191  $\mu$ L, 2.54 mmol), divinyl sulfone (1.00 equiv, 85.1  $\mu$ L, 0.847 mmol), tris(4-methoxyphenyl)phosphine (0.01 equiv, 0.00292 g, 0.00828 mmol)

$^1\text{H-NMR}$  (300 MHz,  $\text{CDCl}_3$ )  $\delta$  3.85 (dd, 4H,  $\text{-CH}_2\text{-CH}_2\text{-S-}$ ), 3.42 (t, 4H,  $\text{CH}_3\text{-CH}_2\text{-CH}_2\text{-}$ ), 3.32 (t, 4H,  $\text{-CH}_2\text{-CH}_2\text{-S-}$ ), 1.70-1.43 (m, 4H,  $\text{CH}_3\text{-CH}_2\text{-}$ ), 0.91 (t, 6H,  $\text{CH}_3\text{-}$ ).

$^{13}\text{C-NMR}$  (75.53 MHz,  $\text{CDCl}_3$ )  $\delta$  73.15 ( $\text{CH}_3\text{-CH}_2\text{-CH}_2\text{-}$ ), 64.30 ( $\text{-CH}_2\text{-CH}_2\text{-S-}$ ), 55.03 ( $\text{-CH}_2\text{-CH}_2\text{-S-}$ ), 22.81 ( $\text{CH}_3\text{-CH}_2\text{-}$ ), 10.65 ( $\text{CH}_3\text{-}$ )

**3-(2-((2-Allyloxy)ethyl)sulfonyl)ethoxy)prop-1-ene (3c):**

Prop-2-en-1-ol (3.00 equiv, 174  $\mu$ L, 2.54 mmol), divinyl sulfone (1.0 equiv, 85.1  $\mu$ L, 0.847 mmol), tris(4-methoxyphenyl)phosphine (0.01 equiv, 0.00298 g, 0.00846 mmol)

$^1\text{H-NMR}$  (300 MHz,  $\text{CDCl}_3$ )  $\delta$  5.91 – 5.82 (m, 2H,  $\text{CH}_2\text{-CH-}$ ), 5.22 (m, 4H,  $\text{CH}_2\text{-CH-}$ ), 4.03 (d, 4H,  $\text{-CH-CH}_2\text{-O-}$ ), 3.88 (t, 4H,  $\text{-CH}_2\text{-CH}_2\text{-S-}$ ), 3.36 (t, 4H,  $\text{-CH}_2\text{-CH}_2\text{-S-}$ ).

**3-(2-((2-Prop-2-yn-1-yloxy)ethyl)sulfonyl)ethoxy)prop-1-yne (3d):**

Prop-2-yn-1-ol (3.0 equiv, 152.2  $\mu$ L, 2.54 mmol), divinyl sulfone (1.0 equiv, 85.1  $\mu$ L, 0.847 mmol), tris(4-methoxyphenyl)phosphine (0.01 equiv, 0.00290 g, 0.00823 mmol)

$^1\text{H-NMR}$  (300 MHz,  $\text{CDCl}_3$ )  $\delta$  4.27 (d, 4H,  $\text{-C-CH}_2\text{-}$ ), 3.98 (t, 4H,  $\text{-CH}_2\text{-CH}_2\text{-S-}$ ), 3.36 (t, 4H,  $\text{-CH}_2\text{-CH}_2\text{-S-}$ ), 2.48 (d, 2H,  $\text{CH-C-}$ )

SR32B 24h, Fischer

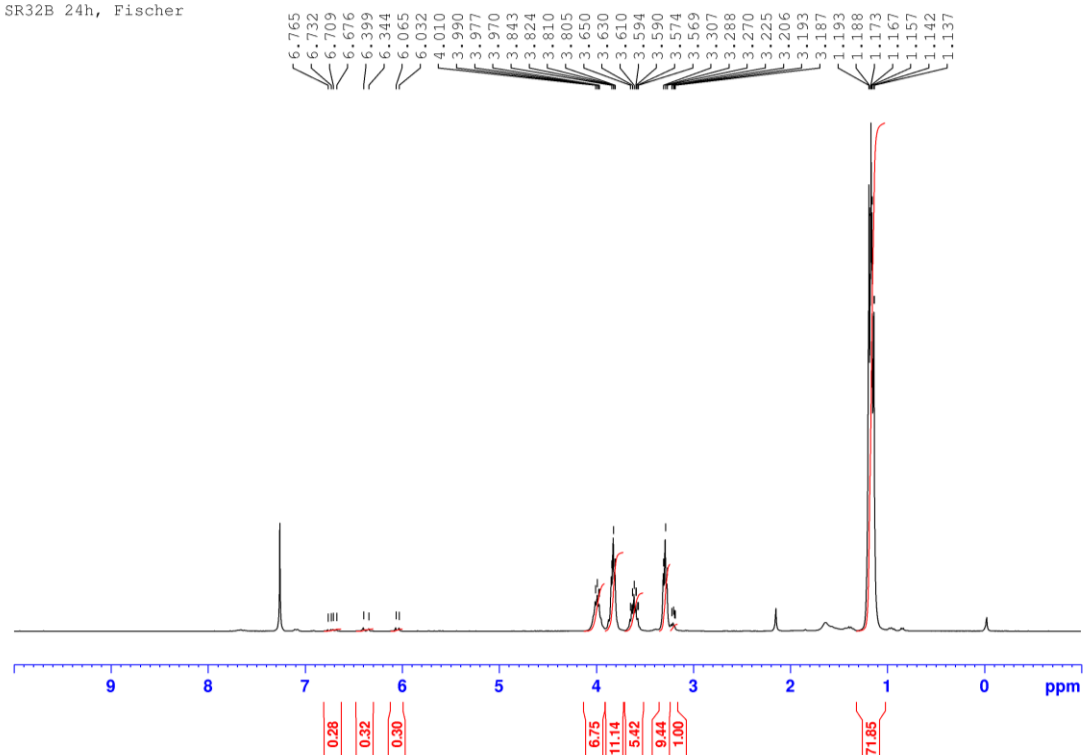

**Figure S9:**  $^1\text{H}$ -NMR spectrum (300 MHz,  $\text{CDCl}_3$ ) of **3a** after 24 h reaction time; as catalyst TMTTP was used; mono/di ratio was calculated from the peak at 3.19 and the peak at 3.29 ppm.

SR31C 1h, Fischer

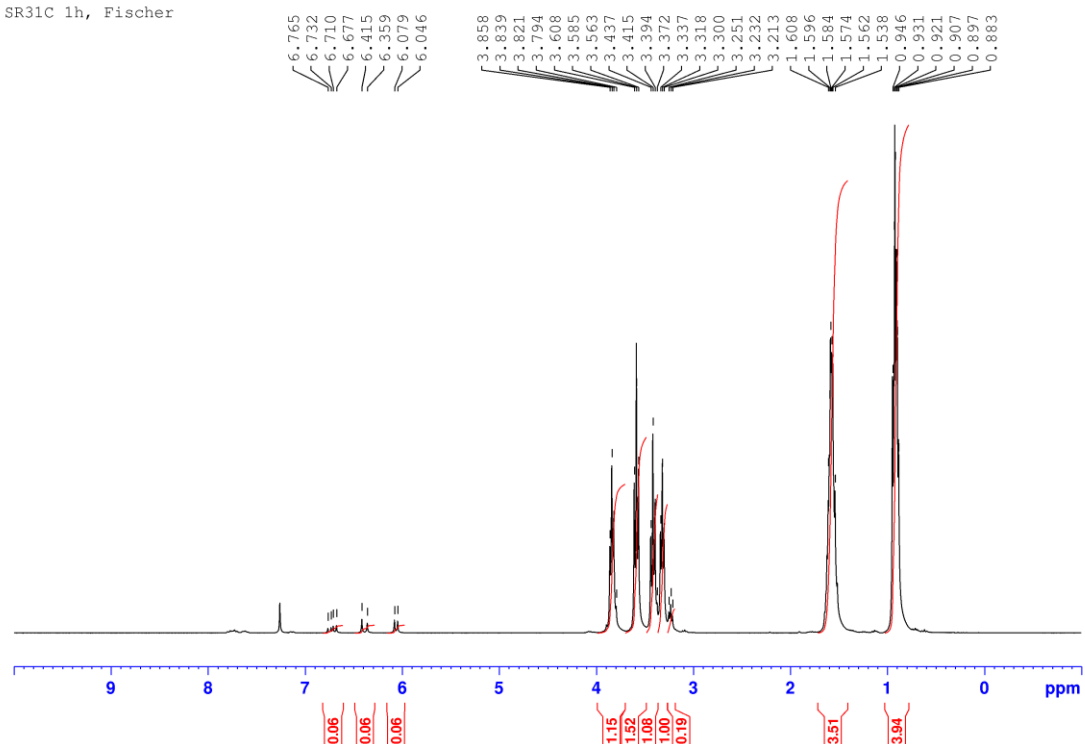

**Figure S10:**  $^1\text{H}$ -NMR spectrum (300 MHz,  $\text{CDCl}_3$ ) of **3b** after 1 h reaction time; as catalyst MMTTP was used; mono/di ratio was calculated from the peak at 3.23 and the peak at 3.32 ppm.

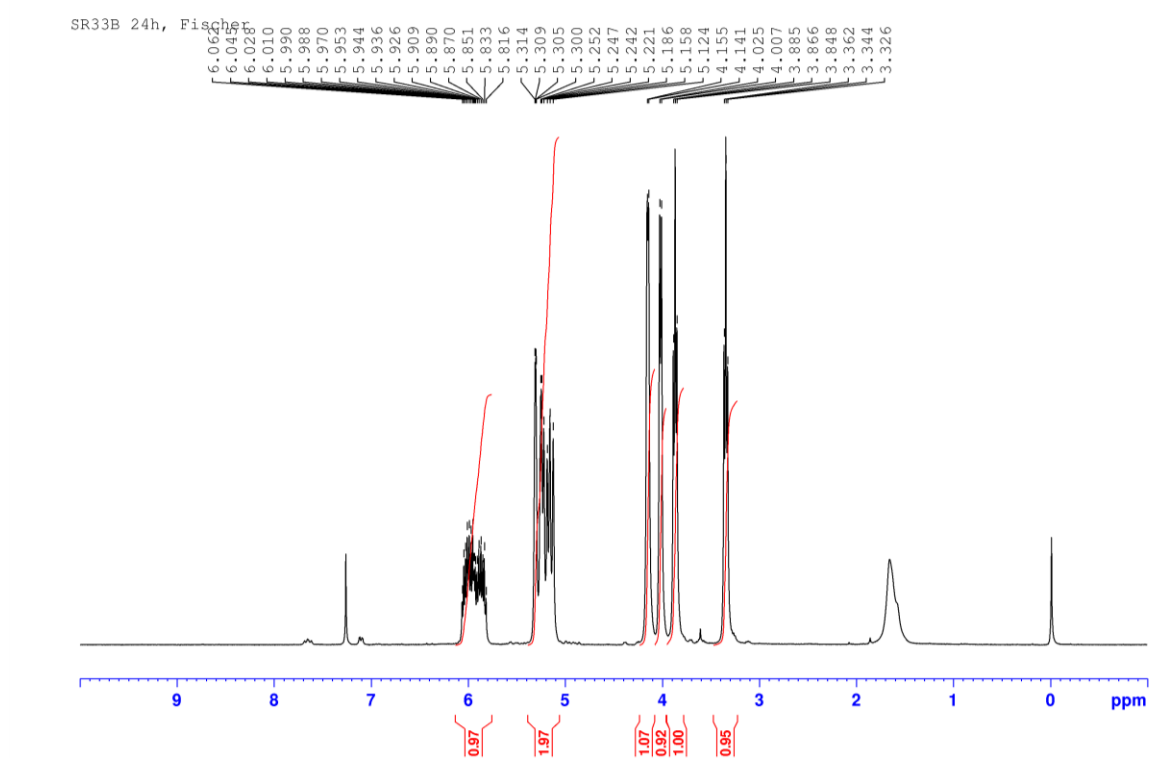

**Figure S11:**  $^1\text{H}$ -NMR spectrum (300 MHz,  $\text{CDCl}_3$ ) of **3c** after 24 h reaction time; as catalyst TMTTP was used; mono/di ratio was calculated from the peak at 3.26 (not visible in this spectrum) and the peak at 3.35 ppm.

SR34 A, Ratzenboeck

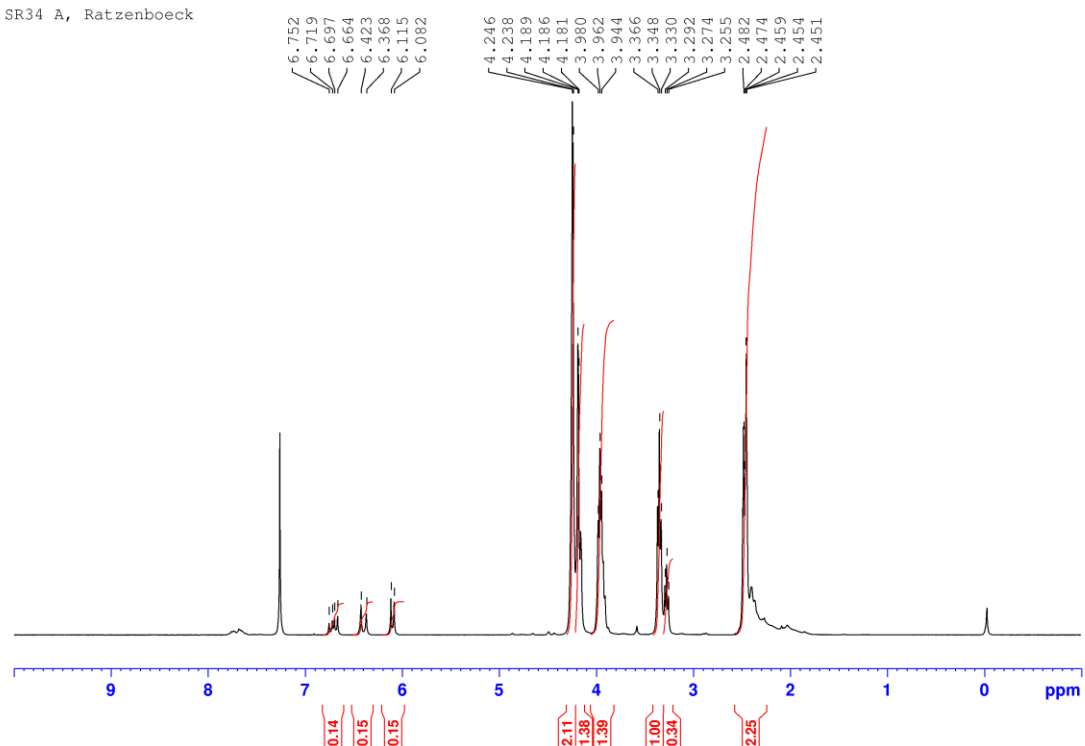

**Figure S12:** <sup>1</sup>H-NMR spectrum (300 MHz, CDCl<sub>3</sub>) of **3d** after 24 h reaction time; as catalyst TPP was used; mono/di ratio was calculated from the peak at 3.27 and the peak at 3.35 ppm.



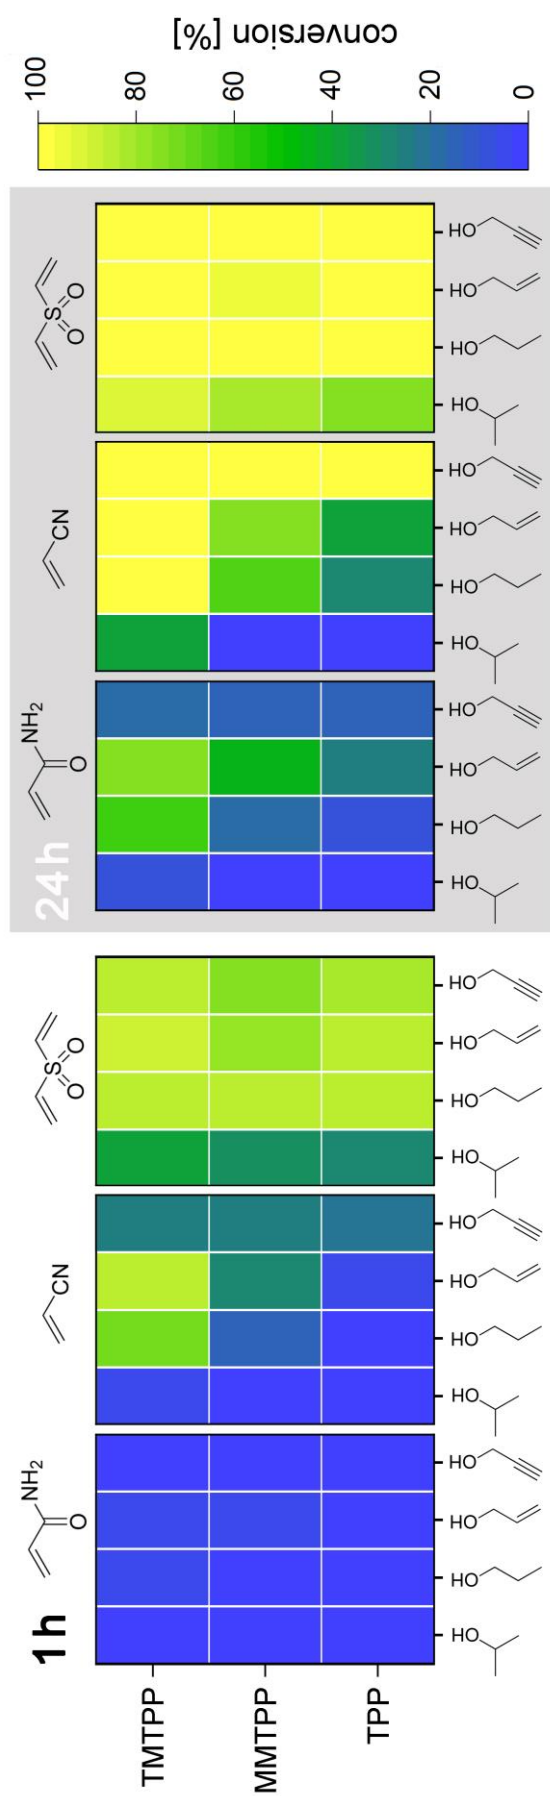

**Figure S13:** Heat-map plot of all reactions

### *Oxa-Michael addition polymerization of 2-hydroxyethyl acrylate (HEA)*

Calculation of double bond conversion of 2-hydroxyethyl acrylate:

$$\text{Double bond conversion [\%]} = \frac{\text{integral 2.62 ppm} / 2}{\text{integral 5.85} + \text{integral 2.62} / 2} * 100$$

Calculation of Rauhut–Currier share:

$$\text{Rauhut – Currier share [\%]} = \frac{\text{integral 5.61}}{\frac{\text{integral 2.62} - 4 * \text{integral 5.61}}{2}} * 100$$

**Table S4:** Conversion of 2-hydroxyethyl acrylate [%] after 24 h, molecular weight  $M_n$  of the formed polymers, polydispersity index (D) and Rauhut–Currier share [%]

| Catalyst | T [°C] | conversion [%] | $M_n$ [g/mol] | D   | Rauhut-Currier share [%] |
|----------|--------|----------------|---------------|-----|--------------------------|
| TPP      | 23     | 74             | 660           | 1.5 | 5                        |
| TPP      | 80     | 89             | 680           | 1.6 | 20                       |
| MMTPP    | 23     | 87             | 910           | 1.7 | 6                        |
| MMTPP    | 80     | 97             | 820           | 1.7 | 17                       |
| TMTTPP   | 23     | 95             | 1160          | 1.8 | 6.5                      |
| TMTTPP   | 80     | 99             | 890           | 1.8 | 17                       |

$^1\text{H-NMR}$  (300 MHz,  $\text{CDCl}_3$ )  $\delta$  6.47 (d, 1H), 6.20 (s, 6H), 5.84 (d, 1H), 4.33-4.21 (m, 76 H), 3.82-3.56 (m, 141 H), 2.61 (t, 70H).

$^{13}\text{C-APT NMR}$  (75.53 MHz,  $\text{CDCl}_3$ )  $\delta$  171.4, 126.6, 72.27, 70.39, 68.96, 66.80-66.15, 64.07, 63.88, 63.62, 62.33, 61.66, 60.98, 34.99.

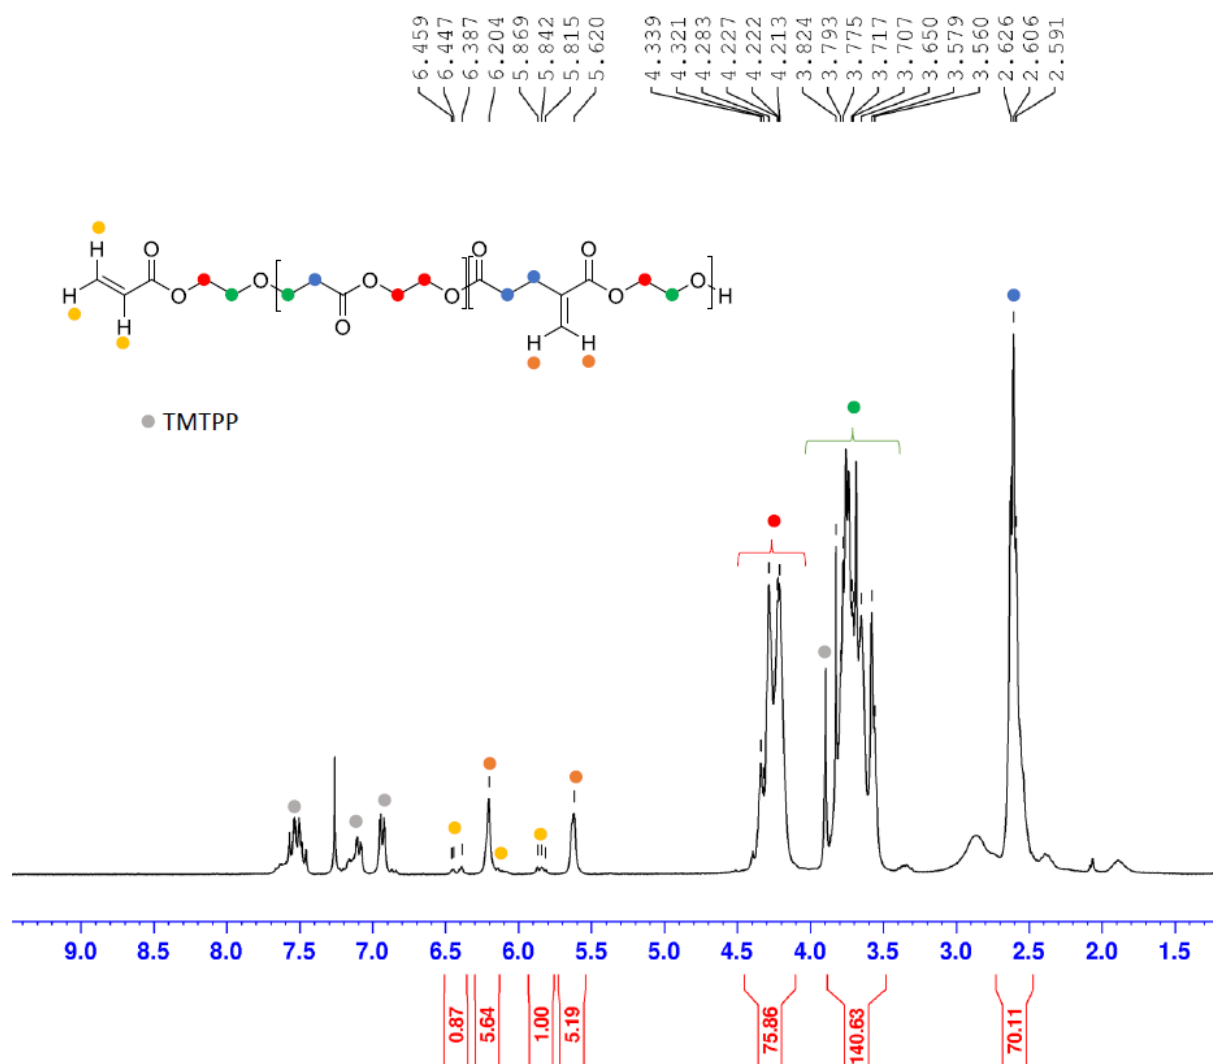

**Figure S14:**  $^1\text{H}$ -NMR spectrum (300 MHz,  $\text{CDCl}_3$ ) of poly4 after 24 h at 80°C with TMTTP (5 mol %) as catalyst

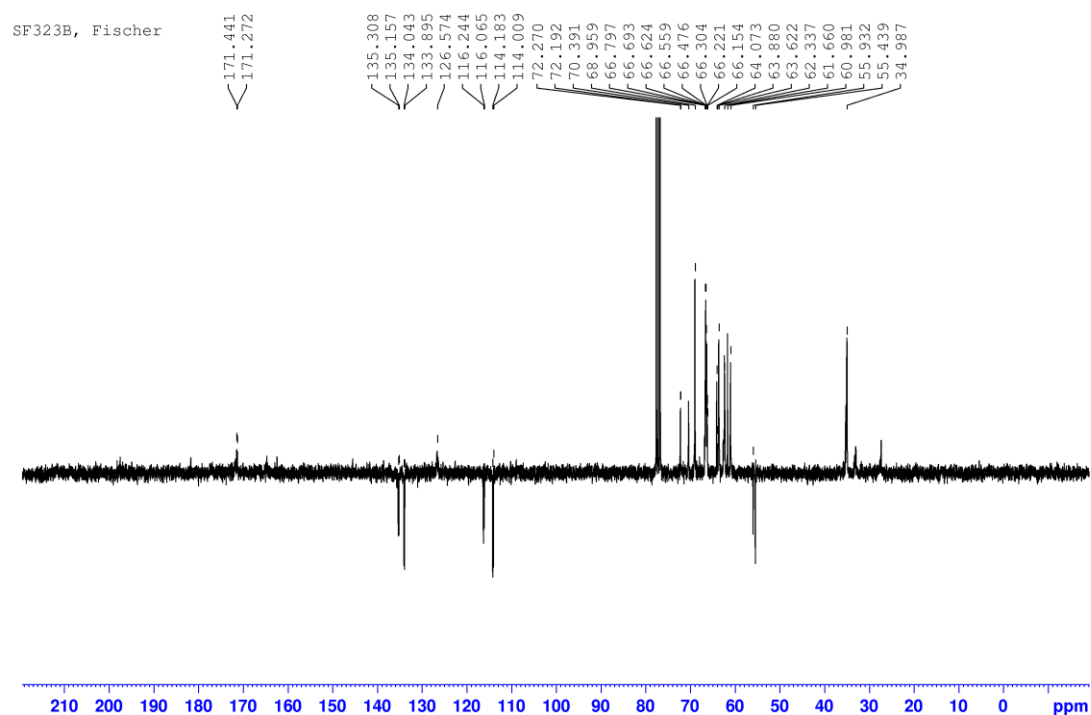

**Figure S15:**  $^{13}\text{C}$ -APT spectrum (300 MHz,  $\text{CDCl}_3$ ) of poly4 after 24 h at 80 °C with TMTTP (5 mol %) as catalyst

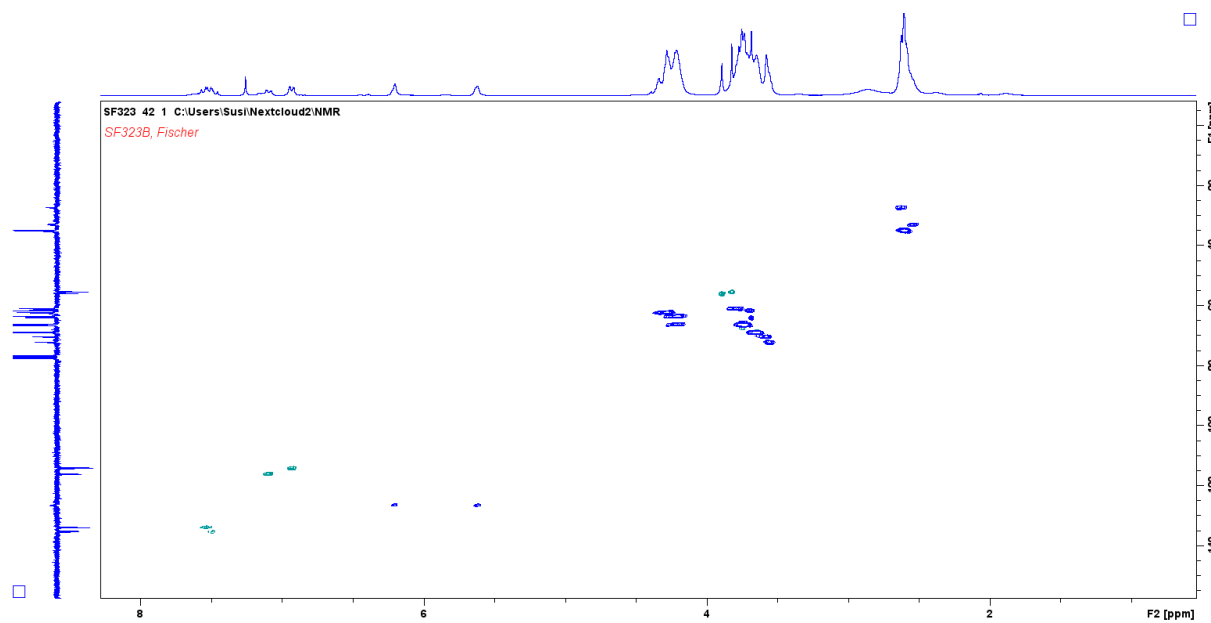

**Figure S16:** HSQC of poly4 after 24 h at 80 °C with TMTTP (5 mol %) as catalyst

**Oxidation experiments ( $^{31}\text{P}$ -NMR)**

**Table S5:**  $^{31}\text{P}$ -NMR shifts (in  $\text{CDCl}_3$ ) of TPP, MMTTP and TMTTP and their corresponding phosphine oxides relative to 85%  $\text{H}_3\text{PO}_4$

|                 | TPP   | MMTTP | TMTTP |
|-----------------|-------|-------|-------|
| phosphine       | -5.02 | -6.69 | -9.82 |
| phosphine oxide | 29.42 | 29.24 | 28.96 |

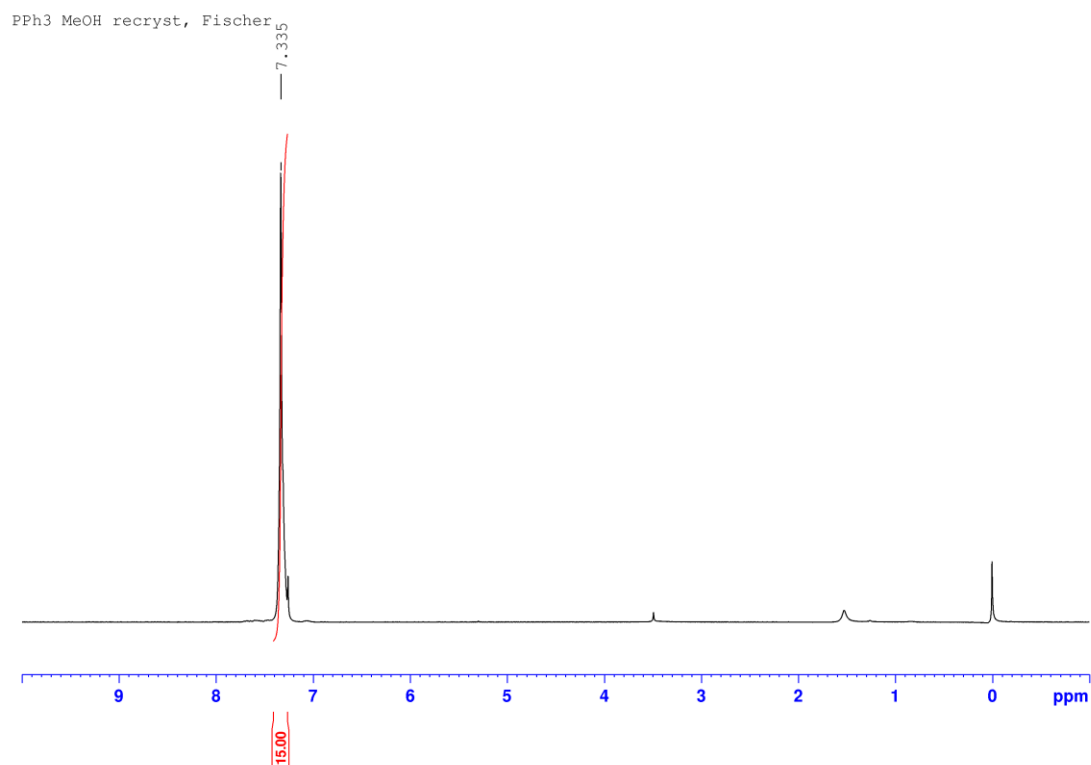

**Figure S17:**  $^1\text{H}$ -NMR (300 MHz,  $\text{CDCl}_3$ ) spectrum of TPP

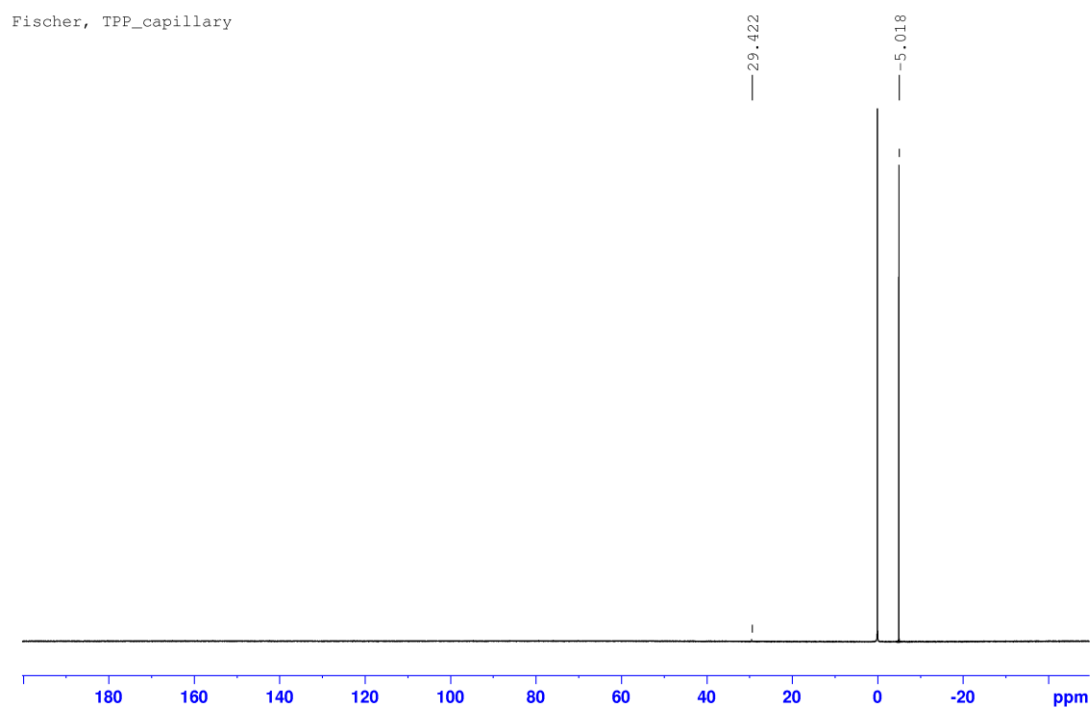

**Figure S18:**  $^{31}\text{P}$ -NMR (202.55 MHz,  $\text{CDCl}_3$ ) spectrum of TPP

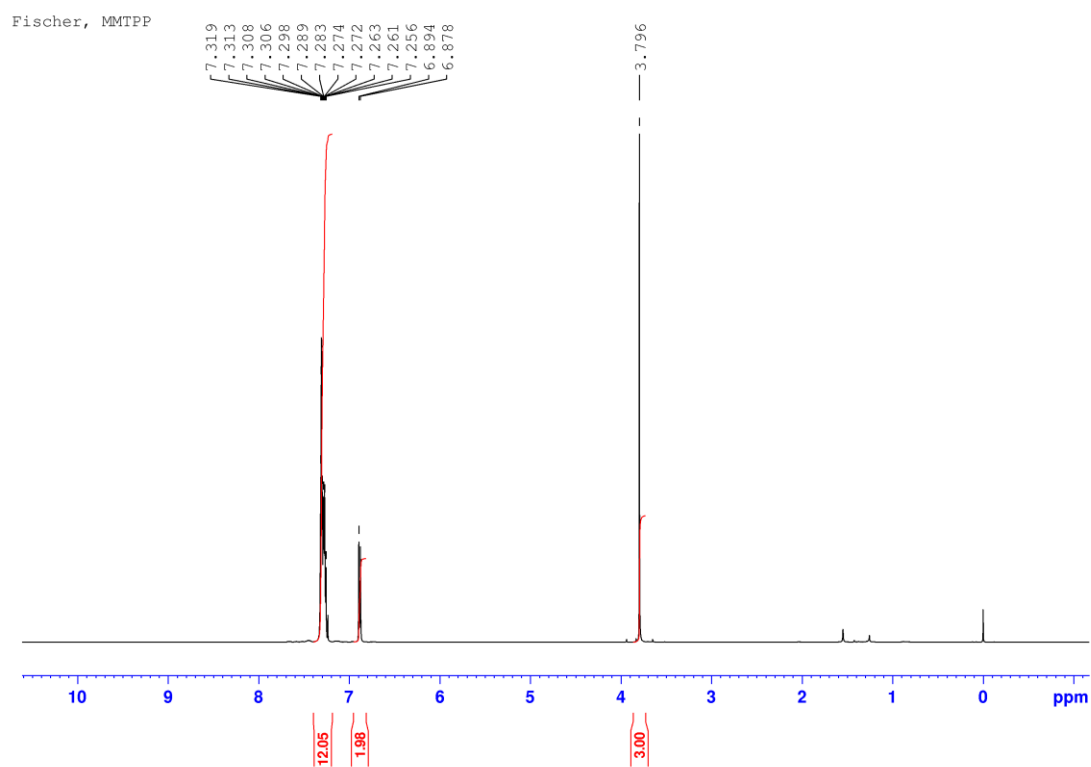

**Figure S19:**  $^1\text{H}$ -NMR (500 MHz,  $\text{CDCl}_3$ ) spectrum of MMTTP

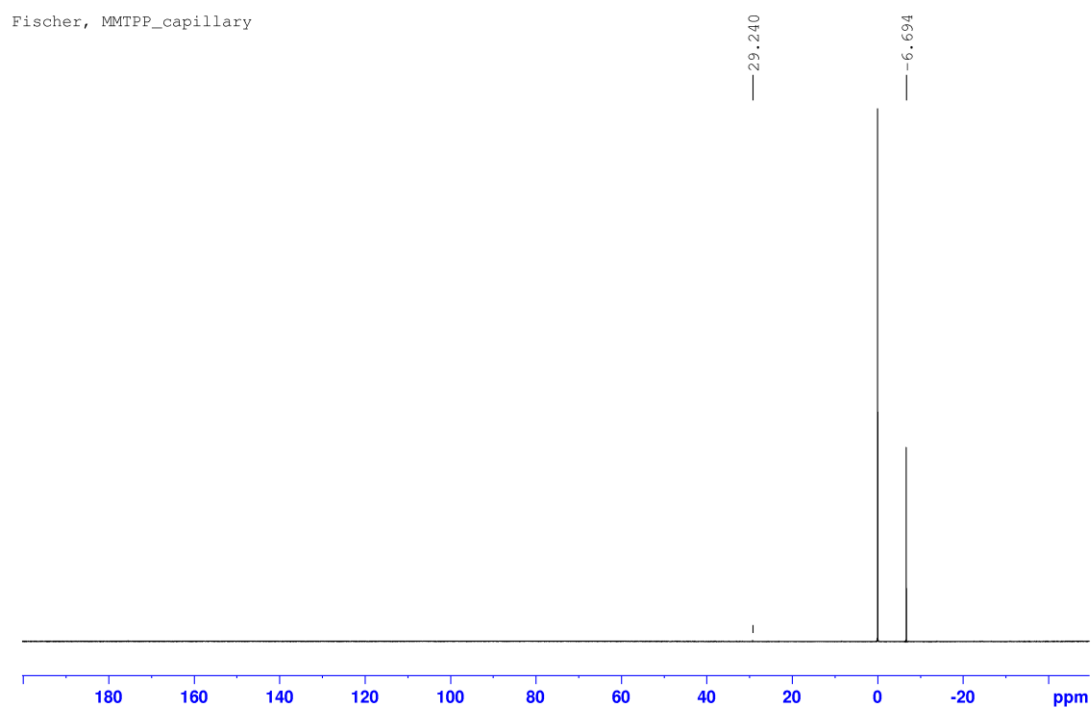

**Figure S20:**  $^{31}\text{P}$ -NMR (202.55 MHz,  $\text{CDCl}_3$ ) spectrum of MMTPP

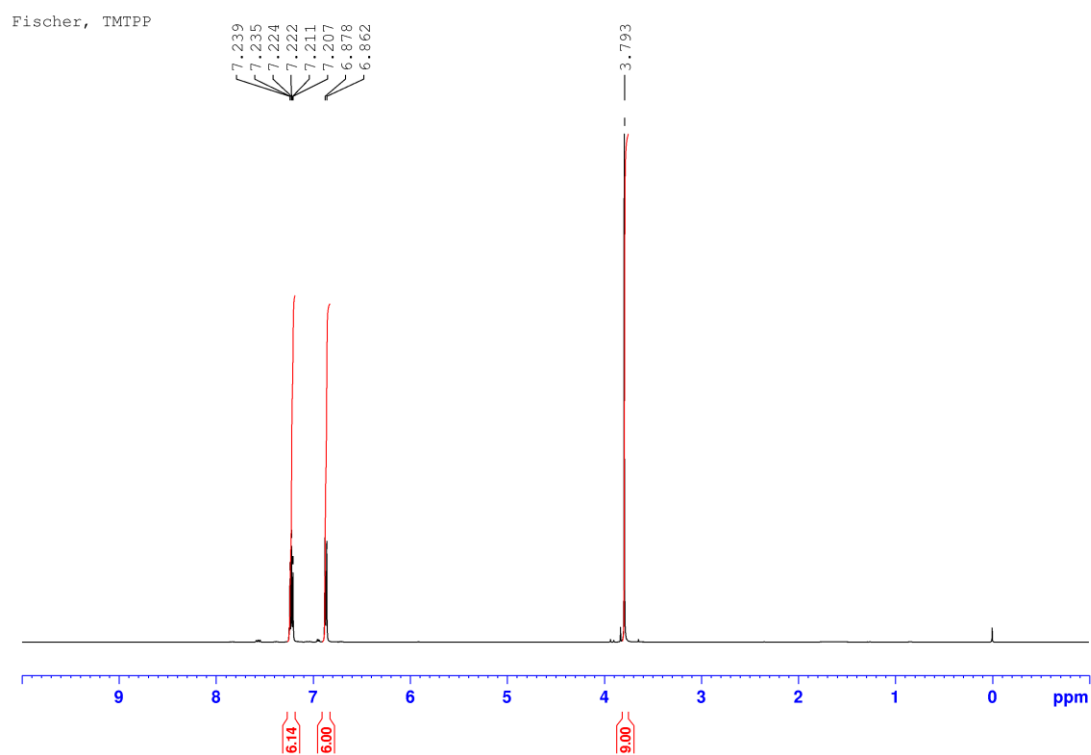

**Figure S21:**  $^1\text{H}$ -NMR (500 MHz,  $\text{CDCl}_3$ ) spectrum of TMTTP

Fischer, TMTPP\_capillary

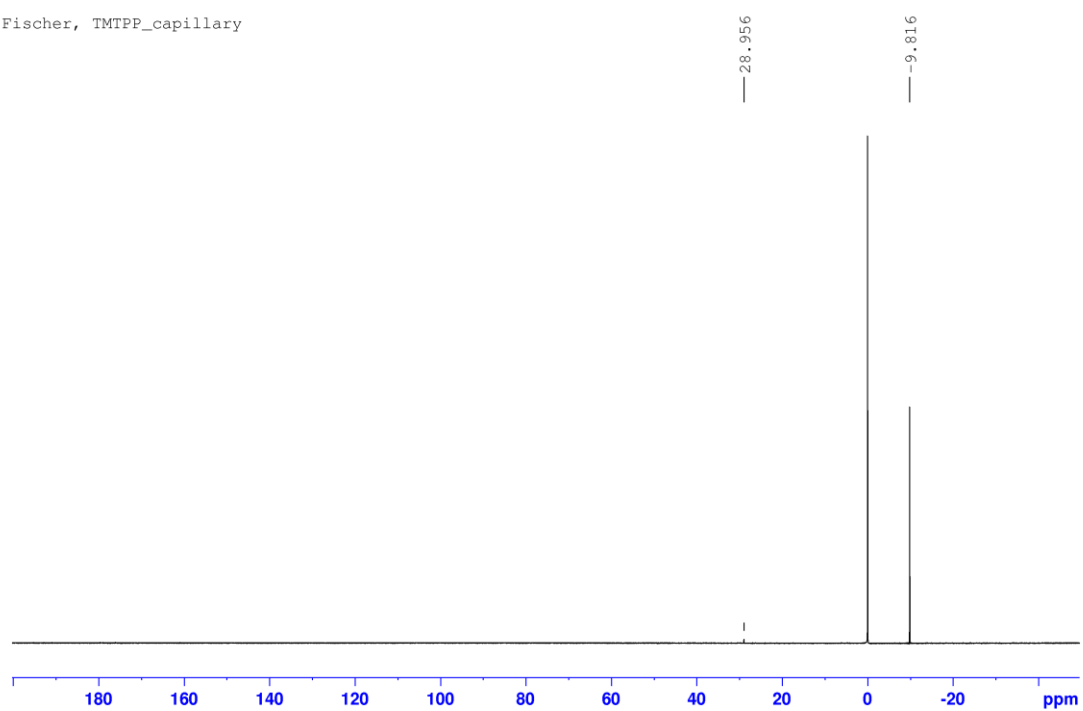

**Figure S22:**  $^{31}\text{P}$ -NMR (202.55 MHz,  $\text{CDCl}_3$ ) spectrum of TMTPP



## Computational details

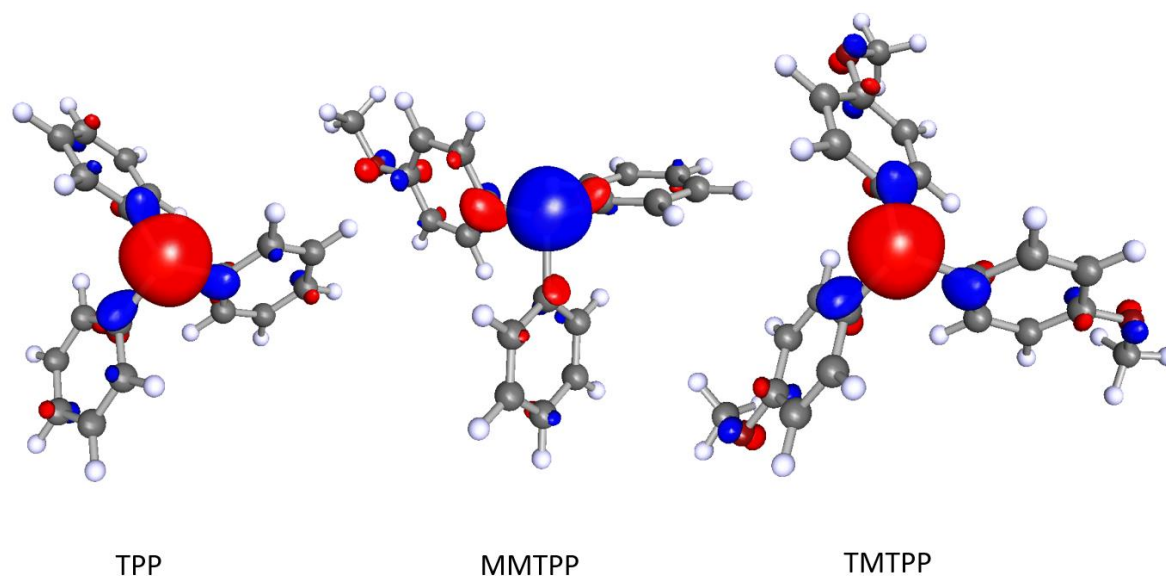

**Figure S23:** Visual representation of the HOMOs of TPP, MMTTP and TMTTP, calculated on B3LYP/def2-TZVPPD level

**Table S6:** Theoretical data for TPP, MMTTP, TMTTP, MCA values from Ref.5,  $pK_a$  values from Ref.6, HOMO and SOMO energies were calculated on B3LYP/def2-TZVPPD level

|       | MCA [kJ/mol] | $pK_a$ | HOMO [eV] | SOMO [eV] |
|-------|--------------|--------|-----------|-----------|
| TPP   | +618.7       | 1.31   | -5.911    | -9.596    |
| MMTPP | -            | 2.85   | -5.728    | -9.175    |
| TMTTP | +651.0       | 4.20   | -5.418    | -8.589    |

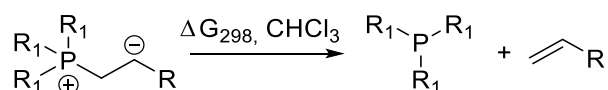

**Scheme S1:** Reaction for the Michael acceptor affinity (MAA) of a phosphine

**Table S7:** Calculated Michael acceptor affinities (MAA in kJ/mol) for phosphines  $\text{PMe}_3$ , TPP, MMTTP and TMTTP and Michael acceptors acrylonitrile, acrylamide and divinyl sulfone on B3LYP/def2-TZVPPD level

|                                                           | R = acrylonitrile | R = acrylamide | R = divinyl sulfone |
|-----------------------------------------------------------|-------------------|----------------|---------------------|
| $R^1 = \text{Me}$                                         | -74.6             | -78.5          | -64.6               |
| $R^1 = \text{Ph}$                                         | -96.4             | -103.9         | -85.6               |
| $R^1 = 2\text{-(CH}_3\text{O)C}_6\text{H}_4$              | -94.2             | -103.9         | -84.9               |
| $R^1 = 2,4,6\text{-(CH}_3\text{O)}_3\text{C}_6\text{H}_2$ | -87.7             | -95.3          | -76.7               |

## References:

- 1 Bergbreiter, D.E.; Yang, Y.-C.; Variable-Temperature NMR Studies of Soluble Polymer-Supported Phosphine-Silver Complexes, *J. Org. Chem.*, **2010**, 75, 873-878.
- 2 Heller, B.; Sundermann, B.; Buschmann, H.; Dexler, H.-J.; You, J.; Holzgrabe, U.; Heller, E.; Oehme, G.; Photocatalyzed [2+2]-cycloaddition of nitriles with acetylene: an effective method for the synthesis of 2-pyridines under mild conditions, *J. Org. Chem.*, **2002**, 67(13), 4414-4422.

- 3 Luu, H.-T.; Wiesler, S.; Frey, G.; Streuff, J.; A Titanium(III)-Catalyzed Reductive Umpolung Reaction for the Synthesis of 1,1-Disubstituted Tetrahydroisoquinolines, *Org. Lett.*, **2015**, *17*(10), 2478-2481.
- 4 Golobokova, T. V.; Pokatilov, F. A.; Proidakov, A. G.; Vereshchagin, L. I.; Kizhnyaev, V. N.; Synthesis of polynuclear azoles linked by ether tethers, *Russ. J. Org. Chem.*, **2013**, *49*(1), 130-137.
- 5 Lindner, C.; Tandon, R.; Maryasin, B.; Larionov, E.; Zipse, H. Cation Affinity Numbers of Lewis Bases. *Beilstein J. Org. Chem.* **2012**, *8*, 1406-1442.
- 6 calculated using the pKa prediction platform (neural network result for solvent H<sub>2</sub>O) available at [www.pka.luo-group.com](http://www.pka.luo-group.com) see: Yang, Q.; Li, Y.; Yang, J.-D.; Liu, Y.; Zhang, L.; Luo, S.; Cheng, J.-P. Holistic Prediction of pKa in Diverse Solvents Based on Machine Learning Approach, *Angew. Chem. Int. Ed.* **2020**, *59*, 19282-19291.
